# Supplementary material for: Photo-Electrochemical Treatment of Reactive Dyes in Wastewater and Reuse of the Effluent: Method Optimization
Source: PubMed Central journal article supplement (PMC5512639; doi:10.3390/ma7117349), 2014-11-14
Supplement: materials-07-07349-s001.pdf [file materials-07-07349-s001.pdf]

## Supporting Information

**Table S1.** Volatile halogenated compounds selected for the identification and quantification.

| <b>Compound</b>         | <b>CAS number</b> | <b>D.L. (<math>\mu\text{g/L}</math>)</b> | <b>Retention time (min)</b> |
|-------------------------|-------------------|------------------------------------------|-----------------------------|
| Bromomethane            | 74-83-9           | 10                                       | 2.50                        |
| Chloroethane            | 75-00-3           | 1.0                                      | 2.65                        |
| Trichlorofluoromethane  | 75-69-4           | 2.5                                      | 3.00                        |
| 1,1- Dichloroethene     | 75-35-4           | 2.5                                      | 3.86                        |
| Dicloromethane          | 75-09-2           | 1.0                                      | 4.90                        |
| 1,1-Dichloroethane      | 75-34-3           | 2.5                                      | 6.55                        |
| Trichloromethane        | 67-66-3           | 1.0                                      | 9.69                        |
| 1,1,1-Trichloroethane   | 71-55-6           | 2.5                                      | 10.07                       |
| Tetrachloromethane      | 56-23-5           | 2.5                                      | 10.63                       |
| Benzene                 | 71-43-2           | 2.5                                      | 11.67                       |
| 1,2-Dichloroethane      | 107-06-2          | 10                                       | 12.02                       |
| Trichloroethene         | 79-01-6           | 1.0                                      | 14.29                       |
| Bromodichloromethane    | 75-27-4           | 5                                        | 16.52                       |
| c-1,3-Dichloropropene   | 10061-01-5        | 10                                       | 18.22                       |
| Tetrachloroethene       | 127-18-4          | 1.0                                      | 21.03                       |
| Dibromocloromethane     | 124-48-1          | 10                                       | 22.32                       |
| Chlorobenzene           | 108-90-7          | 1.0                                      | 24.32                       |
| Ethyl-benzene           | 100-41-4          | 1.0                                      | 24.82                       |
| Tribromomethane         | 75-25-2           | 10                                       | 27.45                       |
| 1-bromo,3-fluorobenzene | 1073-06-9         | 2.5                                      | 28.61                       |
| 1,3-Dichlorobenzene     | 541-73-1          | 1.0                                      | 32.48                       |
| 1,4-Dichlorobenzene     | 106-46-7          | 0.5                                      | 32.85                       |
| 1,2-Dichlorobenzene     | 95-50-1           | 0.5                                      | 34.17                       |
